# Supplementary material
Source: PubMed Central journal article supplement (PMC6376864)
Supplement: NIHMS1004832-supplement-Supplemental.pdf [file NIHMS1004832-supplement-Supplemental.pdf]

Supplemental Table: Reports of Post-Cataract Surgery Herpetic Keratitis in Current Literature

| Study                                   | case | Age/<br>gender | operation                   | previous<br>HSK or<br>medical<br>Hx<br>(history) | Preoperative<br>cornea          | time<br>interval<br>(d:day<br>w: week,<br>M:month) | perioperative<br>medication                                              | surgery<br>incision | clinical<br>features                                         | Main<br>location<br>layer                 | HSK<br>and | HSV-1<br>PCR   |
|-----------------------------------------|------|----------------|-----------------------------|--------------------------------------------------|---------------------------------|----------------------------------------------------|--------------------------------------------------------------------------|---------------------|--------------------------------------------------------------|-------------------------------------------|------------|----------------|
| <b>Irina S<br/>Barequet<sup>4</sup></b> | 1    | 74/F           | Phaco+PCL                   | No Hx                                            | clear                           | 5 w                                                | Topical timolol<br>Topical<br>latanoprost                                | superotemporal      | Branching<br>dendritic<br>lesion                             | Superonasal<br>epithelium                 |            | Not<br>applied |
|                                         | 2    | 73/M           | Phaco+PCL                   | No Hx                                            | Small<br>inferotemporal<br>scar | 1 w                                                | brimonidine                                                              | superotemporal      | SPK<br>→dendrite                                             | Inferotemporal<br>epithelium              |            | Not<br>applied |
|                                         | 3    | 71/M           | Phaco+PCL                   | No Hx                                            | clear                           | 2d                                                 | Topical<br>dexamethasone                                                 | superotemporal      | dendrite                                                     | Upper<br>peripheral<br>epithelium         |            | Not<br>applied |
| <b>Nandesh<br/>Patel<sup>5</sup></b>    | 1    | 34/M           | Phaco+PCL                   | Atopic<br>dermatitis                             | clear                           | 2d                                                 | Oral<br>prednisolone<br>Oral<br>cyclosporine<br>Topical<br>triamcinolone | temporal            | Epi defect<br>then<br>dendrite<br>Eye lid bleb               | Inferior &<br>superotemporal<br>Skin(Lid) |            | positive       |
| <b>Jhanji<sup>6</sup></b>               | 1    | 72/M           | Phaco+PCL                   | No hx                                            | unknown                         | 2w                                                 | Topical steroid                                                          | superior            | Epi defect<br>along with<br>incision<br>Mild A.C<br>reaction | Superior<br>epithelium                    |            | positive       |
|                                         | 2    | 36/M           | Phaco+PCL                   | No hx                                            | unknown                         | unknown                                            | Topical steroid                                                          | superior            | Epi<br>ingrowth<br>Mild A.C<br>reaction                      | Superior<br>epithelium                    |            | positive       |
|                                         | 3    | 64/M           | Phaco+PCL                   | No hx                                            | unknown                         | 6w                                                 | Topical steroid                                                          | temporal            | Epi defect<br>along with<br>incision<br>Mild A.C<br>reaction | Temporal<br>epithelium                    |            | positive       |
| <b>Resende<sup>11</sup></b>             | 1    | 63/M           | Phaco+PCL<br>Previous<br>PK | No Hx                                            | unknown                         | 1m                                                 | Topical<br>prednisolone                                                  | Not written         | Not written                                                  | Not written                               |            | N/A            |
| <b>Olsen<sup>19</sup></b>               | 1    | 29/F           | Phaco+PCL                   | HSK Hx                                           | unknown                         | 7m                                                 | unknown                                                                  | temporal            | Linear KPs                                                   | Corneal<br>endothelium<br>adjacent<br>to  |            | N/A            |

|   |      |                  |         |         |     |                                  |                |                    |    |                                                      |     |
|---|------|------------------|---------|---------|-----|----------------------------------|----------------|--------------------|----|------------------------------------------------------|-----|
| 2 | 59/F | Cataract surgery | unknown | unknown | 3 w | Topical steroid and oral steroid | superotemporal | Line of linear KPs | of | incision<br>Corneal endothelium adjacent to incision | N/A |
|---|------|------------------|---------|---------|-----|----------------------------------|----------------|--------------------|----|------------------------------------------------------|-----|

HSK: herpes simplex keratitis.

SPE: superficial punctate erosion

D's folding: Descemet's membrane folding.

KP: keratic precipitate

Phaco+PCL: phacoemulsification and posterior chamber lens insertion,

PK: penetrating keratoplasty

A.C: anterior chamber
